# Supplementary material
Source: publisher figshare collection journal article supplement (https://sage.figshare.com/ndownloader/files/33082510)

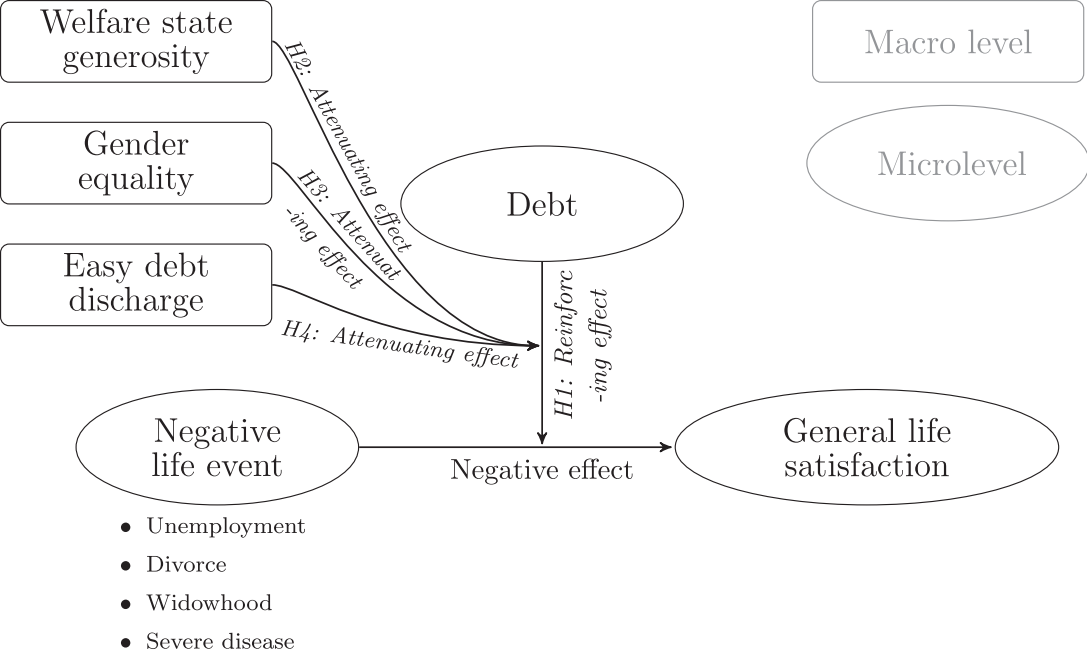

**Figure A1: Illustration of our hypotheses**

Supplement: Supplementary file 1 [file 33082510]
